# Supplementary material for: Universal DNA detection realized by peptide based carbon nanotube biosensors
Source: Royal Society of Chemistry journal article supplement (doi:10.1039/c9na00625g), 2019-11-21
Supplement: c9na00625g1.pdf [file c9na00625g1.pdf]

## Supplementary Materials

### Section 1. SEM identification

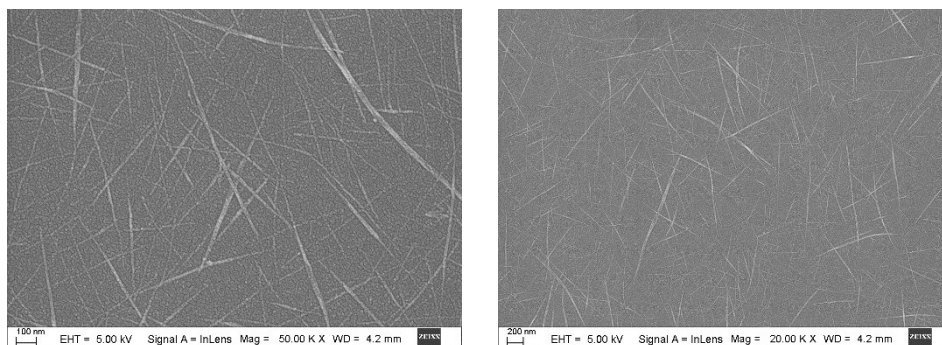

**Figure. S1a.** SEM images of CNT-TFT before modification and washing steps.

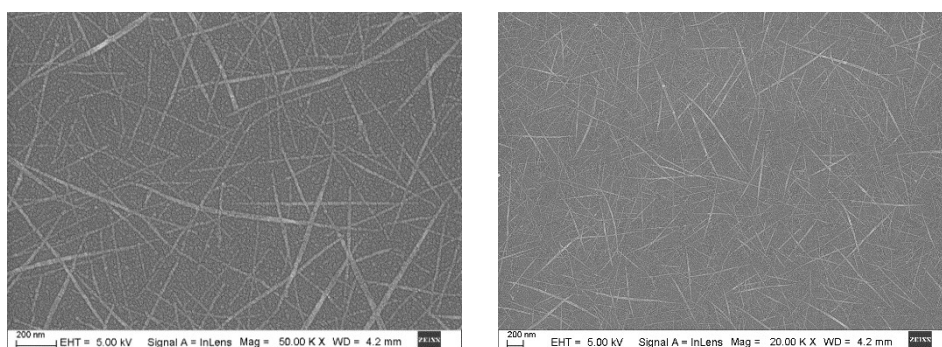

**Figure. S1b.** SEM images of CNT-TFT after modification and washing steps.

### Section 2. AFM identification

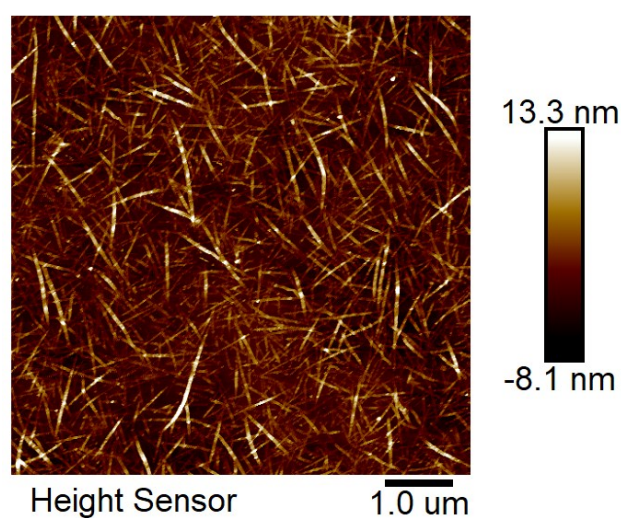

**Figure. S2a.** AFM images of CNT-TFT before modification and washing steps.

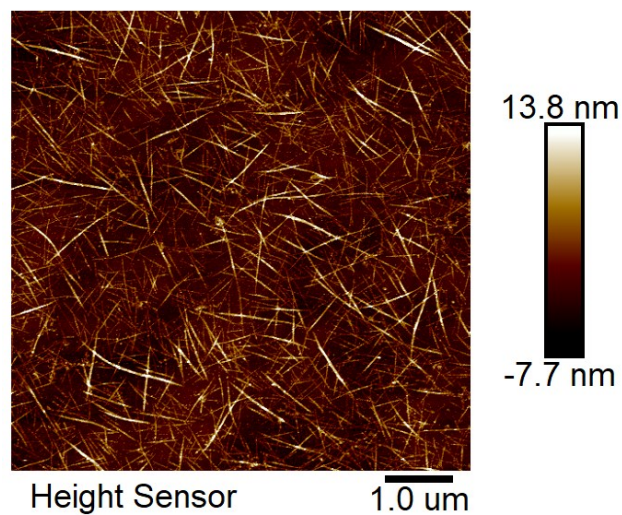

**Figure. S2b.** AFM images of CNT-TFT after modification and washing steps.

### Section 3. Responses of incubation time

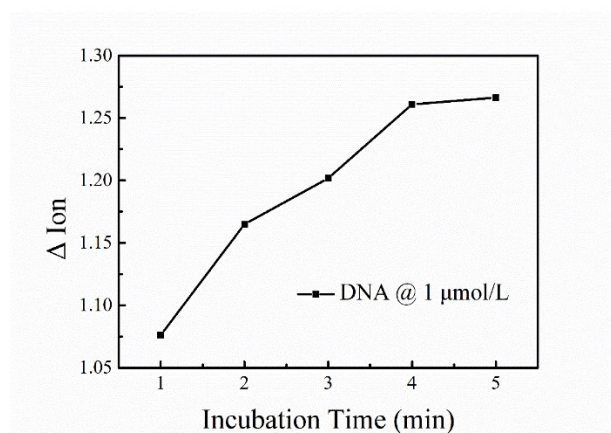

**Figure. S3.** The relationship between  $\Delta I_{on}$  signal and incubation time (1  $\mu\text{mol/L}$ ). When the incubation time increased to 4 minutes, the response signal approached saturation.

### Section 4. Responses of different type of DNA

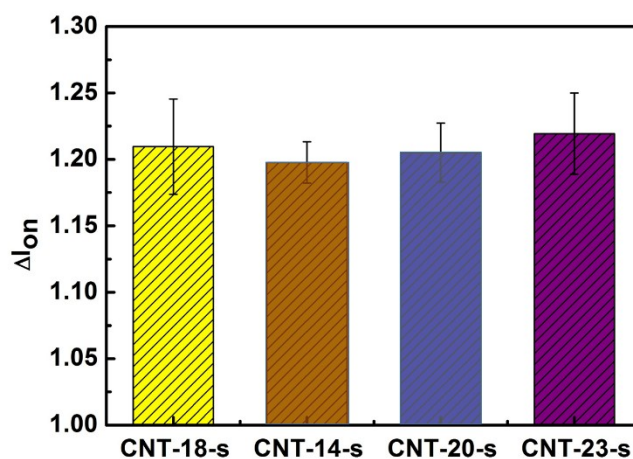

| DNA sample | Sequence                | Single/double strand | GC% |
|------------|-------------------------|----------------------|-----|
| CNT-18-s   | GAAATGTGGCAACTCGTC      | Single strand        | 50% |
| CNT-14-s   | TAGATCGTGTGCCA          | Single strand        | 50% |
| CNT-20-s   | TGACAAGTGTGAGCAGAGGT    | Single strand        | 50% |
| CNT-23-s   | TGACAGGAGTGTGAGCTCTAGAG | Single strand        | 52% |

**Fig. S4**  $\Delta I_{on}$  responses of different length of single DNA.

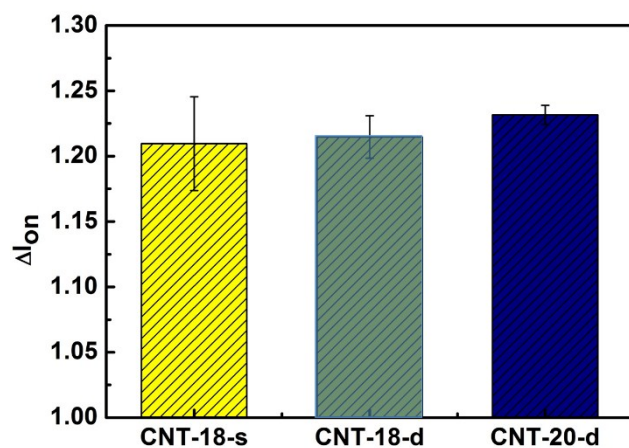

| DNA sample | Sequence             | Single/double strand | GC% |
|------------|----------------------|----------------------|-----|
| CNT-18-s   | GAAATGTGGCAACTCGTC   | Single strand        | 50% |
| CNT-18-d   | TAGGATCGTAGTGCCGAG   | Double strand        | 56% |
| CNT-20-d   | TCAGCATCTGGTGTGACGAT | Double strand        | 50% |

**Fig. S5**  $\Delta I_{on}$  responses of single/double strand DNA.

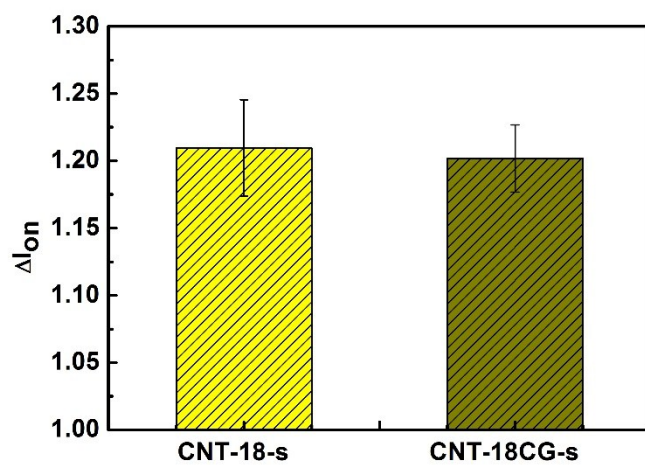

| DNA sample | Sequence           | Single/double strand | GC% |
|------------|--------------------|----------------------|-----|
| CNT-18-s   | GAAATGTGGCAACTCGTC | Single strand        | 50% |
| CNT-18CG-s | TGGCACGTGCTGCAGAGG | Single strand        | 67% |

**Fig. S6**  $\Delta$ Ion responses of single strand DNA with different CG content.

## Section 5. Limit of detection in nonlinear calibration

The limit of detection using the normal distribution is formulated as following:

$$LOD = \bar{y}_b + k_D s_b^{n-1}$$

Here  $\bar{y}_b$  is the average blank signal value,  $s_b^{n-1}$  is the standard deviation of the blanks, n is the number of blanks, and  $k_D=3.1$ . In our experiment, the average blank signal was 1.018 and standard deviation was 0.0066, respectively. The corresponding concentration was obtained by substitute LOD of 1.0378 into fitting Hill-Langmuir equation and the value of LOD concentration was  $1.6 \times 10^{-4}$   $\mu\text{mol/L}$  (the molecular weight of DNA was 5524.6, corresponding LOD was 0.88 $\mu\text{g/L}$ ).

### Reference

1. J. Mocak, A.M. Bond, S. Mitchell, G. Scollary, *Pure Appl. Chem.*, 1997, **69**(2), 297-328.

## Section 6. RNA detection

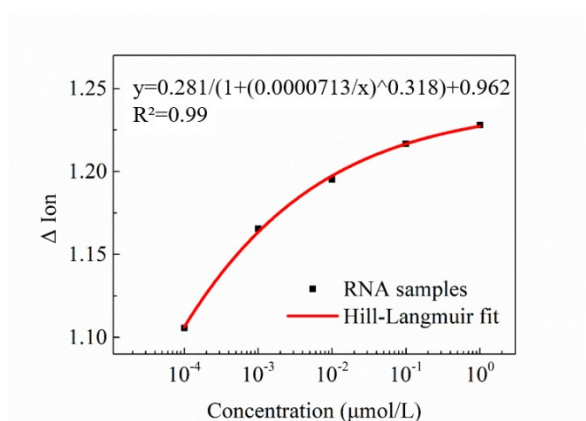

**Figure. S7.** The  $\Delta$ Ion signal responses to RNA concentrations from  $1 \times 10^{-4}$  to 1  $\mu\text{mol/L}$ . The relationship between  $\Delta$ Ion and RNA concentration could be fitted with the Hill-Langmuir model with the fitting correlation coefficient  $R^2$  approximately to 0.99. The maximum response A, response offset Z, and Hill coefficient n were almost same with DNA detection fit parameters.

## Section 7. CW peptide
